# Supplementary material for: A Robust System for Production of Superabundant VP1 Recombinant AAV Vectors
Source: PubMed Central journal article supplement — Mol Ther Methods Clin Dev. 2017 Nov 7;7:146–56. doi: 10.1016/j.omtm.2017.11.002 (PMC5721209; doi:10.1016/j.omtm.2017.11.002), 2017-11-07
Supplement: mmc1.pdf [file mmc1.pdf]

**OMTM, Volume 7**

## **Supplemental Information**

### **A Robust System for Production of Superabundant**

### **VP1 Recombinant AAV Vectors**

**Qizhao Wang, Zhongren Wu, Junping Zhang, Jenni Firrman, Hongying Wei, Zhengjing Zhuang, LinShu Liu, Linqing Miao, Yang Hu, Dong Li, Yong Diao, and Weidong Xiao**

## Supplementary Figure S1: Codon Optimization of Rep52 from AAV2

'Rep52' is original Rep52 of AAV2

'Rep52#' is optimized Rep52 of AAV2

\* indicates that the base remains unchanged

```
Rep52      (1)  ATGGAGCTGGTGGGCTGGCTCGTGGACAAGGGGATTACCTCGGAGAAGCA
Rep52#     (1)  ATGGAA*TAGTGGGCTGG*TTGG*TCGATAAAGGCATCACAAAGCGAAAAACA
***** * * * * * * * * * * * * * * * * * * * * * * * * * * * * *

Rep52      (51) GTGGATCCAGGAGGACCAGGCCTCATACATCTCCTTCAATGCGGCCTCCA
Rep52#     (51) ATGGATTCAAGAAGATCAAGCGAGCTATATTAGTTTAAACGCCGCTAGTA
***** * * * * * * * * * * * * * * * * * * * * * * * * * * * * *

Rep52      (101) ACTCGCGGTCCCAAATCAAGGCTGCCTGGACAATGCGGGAAAGATTATG
Rep52#     (101) ATAGCA*GAAGTCA*GATTAAAGCGCCTCTCGATAACGCCGGCAAATCATG
* * * * * * * * * * * * * * * * * * * * * * * * * * * * *

Rep52      (151) AGCCT*GACTAAAACCGCCCCGACTACCTGGTGGGCCAGCAGCCCGTGGA
Rep52#     (151) TCTTTAACCAAGACAGCTCCTGATTATTTAGT*CGGCAACAACCTGT*CGA
* * * * * * * * * * * * * * * * * * * * * * * * * * * * *

Rep52      (201) GGACATTTCCAGCAATCGGATTTATAAAATTTTGGAACTAAACGGGTACG
Rep52#     (201) AGACATCAGTTCTAACAGAACTACAAGATCCTCGAATTGAATGGCTATG
***** * * * * * * * * * * * * * * * * * * * * * * * * * * * *

Rep52      (251) ATCCCAATATGCGGCTTCCGTCTTTCGGGATGGGCCACGAAAAGTTT
Rep52#     (251) ACCCTCAGTACGCCGCAGTGTGTTCTTAGGC*GGGCTACCAA*GAATTT
* * * * * * * * * * * * * * * * * * * * * * * * * * * * *

Rep52      (301) GGCAAGAGGAACACCATCTGGCTGTTTGGGCCTGCAACTACGGGGAAGAC
Rep52#     (301) GGGAAACGCAATACAATTTGGTTATT*CGGCCCGCCACCACAGGCAAAC
* * * * * * * * * * * * * * * * * * * * * * * * * * * * *

Rep52      (351) CAACATCGCGGAGGCCATAGCCACACTGTGCCCTTCTACGGGTGCGTAA
Rep52#     (351) AAATATTGCCGAAGCTATCGCTCATACCGTCCCTTTCTATGGCTGTGTGA
* * * * * * * * * * * * * * * * * * * * * * * * * * * * *

Rep52      (401) ACTGGACCAATGAGAACTTCCCTTCAACGACTGTGTGACAAAGATGGTG
Rep52#     (401) ATTGGACAAA*CGAAAATTTCCCTTTTAAATGAT*GCGTGGATAAAATGGTC
* * * * * * * * * * * * * * * * * * * * * * * * * * * * *

Rep52      (451) ATCTGGTGGGAGGAGGGGAAGATGACCGCAAGGTCGTGGAGTCGGCCAA
Rep52#     (451) ATTTGGTGGGAAGAAGGCAAATGACAGCTAAAGTGGTCGAAAGCGCTAA
** * * * * * * * * * * * * * * * * * * * * * * * * * * * *

Rep52      (501) AGCCATTCTCGGAGGAAGCAAGGTGCCGCTGGACCAGAAATGCAAGTCCT
Rep52#     (501) GGCTATCTTGGGCGGCTCTAAAGTCAGAGTCGATCAAAAGTGTAAAGTA
* * * * * * * * * * * * * * * * * * * * * * * * * * * * *

Rep52      (551) CGGCCAGATAGACCCGACTCCCGTGATCGTCACCTCCAAACCAACATG
Rep52#     (551) GC*GCTCAAATCGATCC*ACCCTGT*ATTGTGACAAGTAA*ACAAATATG
* * * * * * * * * * * * * * * * * * * * * * * * * * * * *

Rep52      (601) TGGCGCGTGATTGACGGGA*ACTCAACGACCTTCGAACACCAGCAGCCGTT
Rep52#     (601) TGTGCTGT*CATCGATGGCAA*TAGCAC*ACATTGAGCATCAACA*ACCCT
* * * * * * * * * * * * * * * * * * * * * * * * * * * * *

Rep52      (651) GCAAGACCGGATGTTCAAATTTGA*ACTCACCCGCGTCTGGATCATGACT
Rep52#     (651) CCAGGATAGAATGTTTAA*GTT*CGAGTTGACAA*GAAGATTAGACCACGATT
* * * * * * * * * * * * * * * * * * * * * * * * * * * * *

Rep52      (701) TTGGGAAGGTCACCAAGCAGGAAGTCAAAGACTTTTCCGGTGGGCCAAAG
Rep52#     (701) TCGGCAAAGT*GACAAAACA*AGAAGTGAAGGATTTCTTTAGATGGGC*CAA
* * * * * * * * * * * * * * * * * * * * * * * * * * * * *
```



## Supplementary Figure2: Codon Optimization of VP1 from AAV2

'VP1' is original VP1 of AAV2

'VP1#' is optimized VP1 of AAV2

\* indicates that the base remains unchanged

```
VP1      (1)  ATGGCTGCCGATGGTTATCTTCCAGATTGGCTCGAGGACACTCTCTCTGA
VP1#     (1)  ATGGCCGCTGACGGCTACTTGCCCGACTGGTTGGAAGATACCTTGAGCGA
***** ** ** ** ** * ** ** ** ** ** ** ** ** ** ** ** ** ** ** ** ** ** ** ** ** ** ** ** ** ** ** ** ** ** ** ** ** ** ** **
VP1      (51) AGGAATAAGACAGTGGTGGAAAGCTCAAACCTGGCCCACCACCACCAAGC
VP1#     (51) GGCATCCGGCAATGGTGGAAATTGAAGCCCGGACCTCCACCTCCCAAAC
** ** * ** ***** * ** ** ** ** ** ** ** ** ** ** ** ** ** ** ** ** ** ** ** ** ** ** **
VP1      (101) CCGCAGAGCGGCATAAAGACGACAGCAGGGGTCTTGTGCTTCCTGGGTAC
VP1#     (101) CAGCCGAAGACCAAAGATGATTCTCGCGCTTGGTCTTGCCGGCTAT
* ** ** * ** ** ** ** ** ** ** ** ** ** ** ** ** ** ** ** ** ** ** ** ** ** ** ** ** ** **
VP1      (151) AAGTACCTCGGACCCTTCAACGGACTCGACAAGGGAGAGCCGGTCAACGA
VP1#     (151) AAATATTTGGCCCTTTTAAATGGCTTGGATAAAGCGAACCCGTGAATGA
** ** * ** ** ** ** ** ** ** ** ** * ** ** ** ** ** ** ** ** ** ** ** ** ** ** ** ** ** ** **
VP1      (201) GGCAGACGCCCGGCCCTCGAGCACGACAAAGCCTACGACCGGCAGCTCG
VP1#     (201) AGCCGATGCTGCGCTTTGGAACATGATAAAGCTTATGATAGACAATTGG
** ** ** ** ** ** ** ** ** * ** ** ** ** ** ** ** ** ** ** ** ** ** ** ** ** ** ** ** ** ** ** ** ** ** ** ** ** ** **
VP1      (251) ACAGCGGAGACAACCCGTACCTCAAGTACAACCACGCCGACGCGGAGTTT
VP1#     (251) ATTCTGGCGATAATCCCTATTTGAAATATAATCATGCTGATGCCGAATTC
*   ** ** ** ** ** ** ** ** ** * ** ** ** ** ** ** ** ** ** ** ** ** ** ** ** ** ** ** ** ** ** ** ** **
VP1      (301) CAGGAGCGCCTTAAAGAAGATACGTCTTTTGGGGCAACCTCGGACGAGC
VP1#     (301) CAAGAAAGATTGAAGGAGGACACCAGCTTCGGCGGGAAATTTGGGCAGGGC
** ** * ** ** ** ** ** ** ** ** ** * ** ** ** ** ** ** ** ** ** ** ** ** ** ** ** ** ** **
VP1      (351) AGTCTTCCAGGCGAAAAGAGGGTTCTTGAACCTCTGGGCCTGGTTGAGG
VP1#     (351) CGTGTTCAGCCAAAGAAACCGGTGTGGAGCCCTTAGGGTTAGTGAAG
** ** ** ** ** ** ** ** ** ** ** * ** ** ** ** ** ** ** ** ** ** ** ** ** ** ** ** ** ** ** ** ** **
VP1      (401) AACCTGTTAAGACGGCTCCGGGAAAAAGAGGCCGGTAGAGCACTCTCCT
VP1#     (401) AGCCCGTGAAAACCGCCCTGGCAAGAAACGCCCGTGGAACATAGCCCC
* ** ** ** ** ** ** ** ** * ** ** ** ** ** ** * ** ** ** ** ** * ** ** ** *
VP1      (451) GTGGAGCCAGACTCCTCCTCGGGAACGGAAAGCGGGCAGCAGCCTGC
VP1#     (451) GTCGAACCCGATAGTAGTAGCGGCACAGGCAAAGCCGGCAACAACCCGC
** ** ** ** ** ** * ** ** ** ** ** * ** ** ** * ** ** ** *
VP1      (500) AAGAAAAAGATTGAATTTGGTCACTGGAGACGCAGACTCAGTACCTG
VP1#     (500) CCGGAAAGCGGCTCAACTTCGGCCAAACCGCGATGCCGATAGCGTGCCG
* ** * ** ** ** * ** ** ** * ** ** * ** ** *
VP1      (550) ACCCCAGCCTCTCGGACAGCCACCAGCAGCCCTCTGGTCTGGGAACT
VP1#     (550) ATCCTCAACCCTTGGGCCAACCACCGCCGCTCCTAGCGGCTTAGGCACC
* ** ** ** * ** ** ** * ** ** * ** ** * ** ** *
VP1      (600) AATACGATGGCTACAGGCAGTGGCGCACCAATGGCAGACAATAACGAGGG
VP1#     (600) AACACTATGGCCACCGGTCCGGTGCCTATGGCCGATAACAATGAAGG
** ** ***** ** ** * ** ** ** * ** ** * ** ** *
VP1      (650) CGCCGACGGAGTGGGTAATTCCTCGGAAATTGGCATTGCATTCCACAT
VP1#     (650) GGCTGATGGCGTGGCAAAGTAGCGGCAACTGGCACTGTGACAGTACCT
** ** ** ** ** * ** ** * ** ** * ** ** * ** ** *
VP1      (700) GGATGGGCGACAGAGTCATCACCACAGCACCCGAACCTGGGCCTGCC
```



```

* * * * *
VP1 (1599) TTTCTCAGAGCGGGGTTCTCATCTTTGGGAAGCAAGGCTCAGAGAAAAC
VP1# (1599) TTCCACAATCTGGCGTGTIGATTTTCGGCAAACAGGGGAGCGAAAAGAC
** * * * * * ** * * * * * ** * * * * * ** * * * * *
VP1 (1649) AAATGTGGACATTGAAAAGGTCATGATTACAGACGAAGAGGAAATCAGGA
VP1# (1649) CAACGTCGATATTGAGAAAGTGATGATCACCGATGAGGAAGAGATTGCGCA
** * * * * * ** * * * * * ** * * * * * ** * * * * *
VP1 (1699) CAACCAATCCCGTGGCTACGGAGCAGTATGGTTCTGTATCTACCAACCTC
VP1# (1699) CCACAAACCTGTGCGCACCGAACAATACGGCAGCGTGAGCACAAATTTG
* * * * * ** * * * * * ** * * * * * ** * * * * *
VP1 (1749) CAGAGAGGCAACAGACAAGCAGCTACCGCAGATGTCAACACACAAGGCGT
VP1# (1749) CAACGGGGTAAATCGGCAGGCCGCCACAGCCGACGTGAATACCCAGGGAGT
** * * * * * ** * * * * * ** * * * * * ** * * * * *
VP1 (1799) TCTTCCAGGCATGGTCTGGCAGGACAGAGATGTGTACCTTCAGGGGCCCA
VP1# (1799) GTTGGCCGGGATGGTGTGGCAAGATCGGGACGTCTATTTGCAAGGCCCTA
* * * * * ** * * * * * ** * * * * * ** * * * * *
VP1 (1849) TCTGGGCAAGATTCCACACACGGACGGACATTTTCACCCCTCTCCCCTC
VP1# (1849) TTTGGGCCAAAATCCCTCATACCGATGGCCACTTTCATCCTAGCCCTTTG
* * * * * ** * * * * * ** * * * * * ** * * * * *
VP1 (1899) ATGGGTGGATTTCGACTTAAACACCCTCCTCCACAGATTCTCATCAAGAA
VP1# (1899) ATGGGCGGCTTTGGCTTGAAGCATCCTCCGCCCAAATCTTGATTAATAA
* * * * * ** * * * * * ** * * * * * ** * * * * *
VP1 (1949) CACCCCGGTACCTGCGAATCCTTCGACCACCTTCAGTGCGGCAAAAGTTTG
VP1# (1949) TACACCGTGCCCGCAAACCCAGCACAAACATTTCCGCCGCCAAATTCG
** * * * * * ** * * * * * ** * * * * * ** * * * * *
VP1 (1999) CTTCCATCATCACAGTACTCCACGGGACAGGTCAGCGTGGAGATCGAG
VP1# (1999) CCAGTTTCATTAACCAATATAGTACCGGCCAAGTGTCTGTGAAATTGAA
* * * * * ** * * * * * ** * * * * * ** * * * * *
VP1 (2049) TGGGAGCTGCAGAAGGAAAACAGCAAACGCTGGAATCCCGAATTTCAGTA
VP1# (2049) TGGGAATTACA AAAAGAGAA TTCTAAGAGATGGAAACCTGAGATCCAATA
* * * * * ** * * * * * ** * * * * * ** * * * * *
VP1 (2099) CACTTCCAATAACAAGTCTGTTAATGTGGACTTTACTGTGGACACTA
VP1# (2099) TACCAGTAATTATAACAAAAGCGTGAAACGTGCGATTTACCGTTCGATACCA
** * * * * * ** * * * * * ** * * * * * ** * * * * *
VP1 (2149) ATGGCGTGATTCAGAGCCTCGCCCATTTGGCACCAGATACCTGACTCGT
VP1# (2149) ACGGGGTTCAGAGCAACCCAGACCTATCGGGACACGGTATTTAACAGAA
* * * * * ** * * * * * ** * * * * * ** * * * * *
VP1 (2199) AATCTGTAA
VP1# (2199) AACTTATAG
** * * *

```

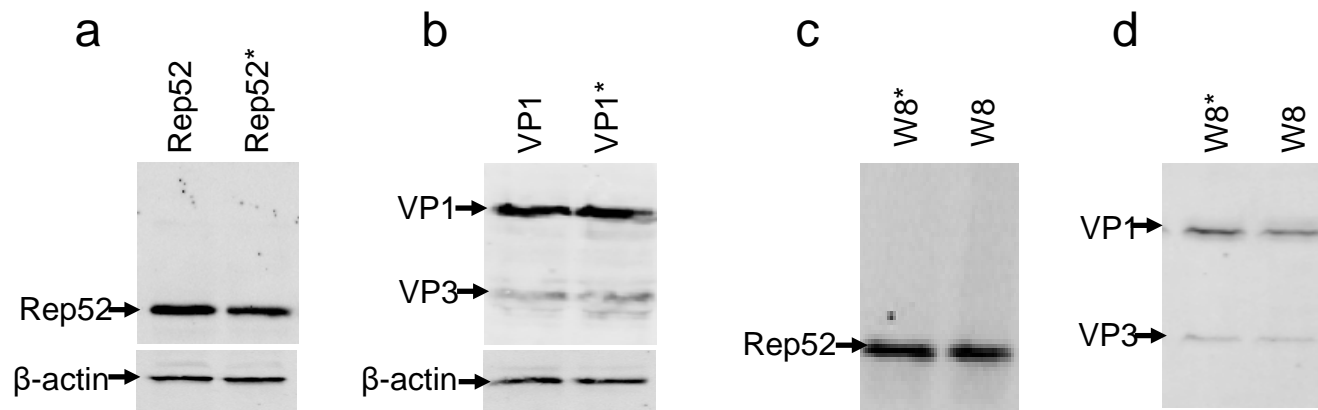

**Supplementary Fig.3 Western blot analysis protein expression from codon-optimized *Rep52* and *VP1*.** (a,b) HeLa-S3 cells were transfected with plasmids encoding codon-optimized *Rep52* (*Rep52\**) and *VP1* (*VP1\**) under control of the CMV promoter. Standard *Rep52* and *VP1* were used as controls. The protein levels of *Rep52* and *VP1* were detected at 48 hs post transfection. (c, d) HeLa-S3 cells were infected with W8 (Fig.1a) or W8\* at MOI=1. The W8 vaccinia viral vector encodes regular *Rep52* and *VP1*, while the W8\* encodes *Rep52\** and *VP1\**. All the genes were under control of the p7.5 promoter. The Rep and Cap proteins were analyzed 24 hs post-infection. In all experiment, Mouse anti-Rep and Mouse anti-VP1, VP2&VP3 were used as detecting antibodies.

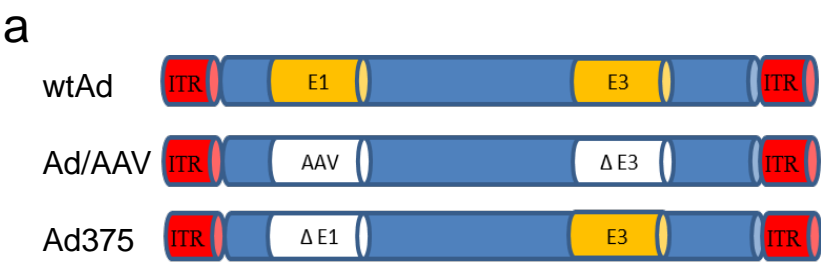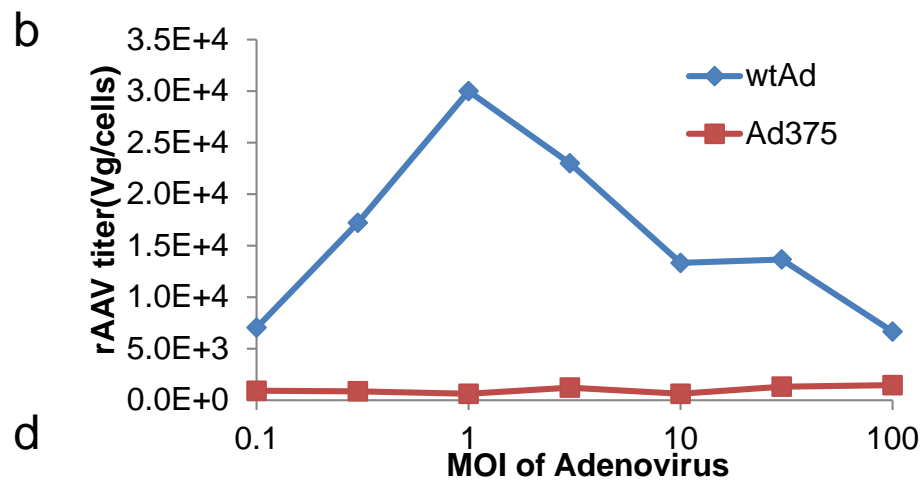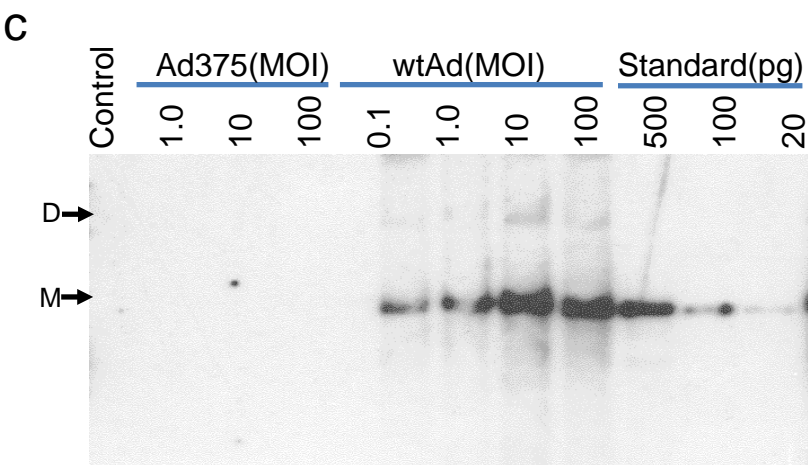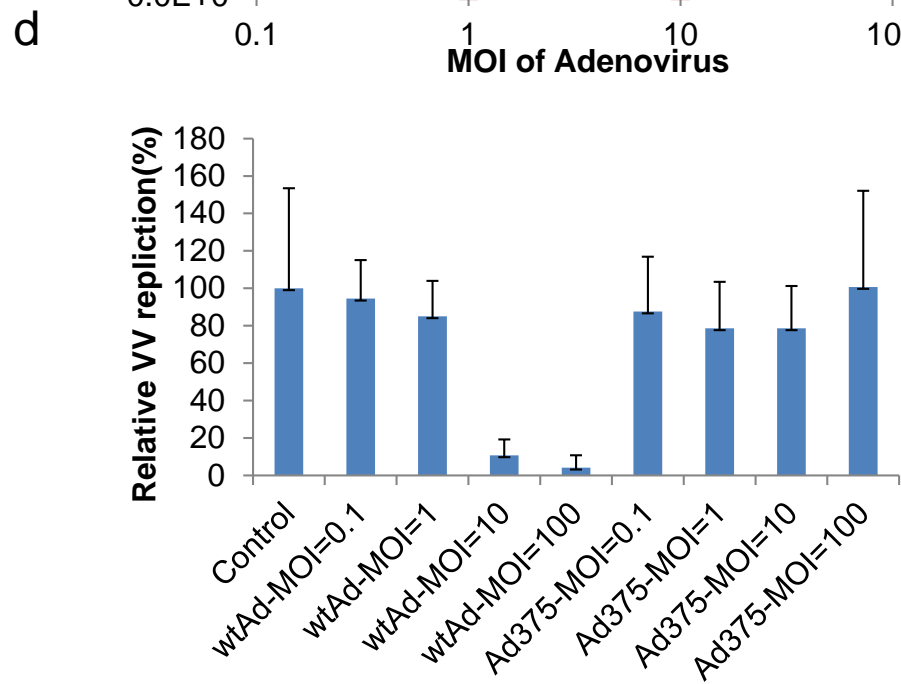



**Supplementary Fig.4 Effects of wtAd and Ad375 on rAAV production, rAAV genome replication, and VV genome replication in the VV-Ad system.** (a) Illustration depicting the structural differences of wtAd, the Ad/AAV hybrid, and Ad375 vectors. wtAd contains both the E1 and E3 region. For the Ad/AAV hybrid vectors, the E3 region was deleted, and the E1 region was replaced with the rAAV genome. The Ad375 adenovirus contains the E3 region, but lacks E1 region. (b) The effect of wtAd and Ad375 on rAAV packaging in Hela-S3 cells. wtAd or Ad375, at different MOIs, were co-infected with Ad/AAV-CMV-EGFP 16 hours before VW22(MOI=1) infection. The rAAV vectors in Hela-S3 cells was harvested 48 hours post VW22 infection. (c) Rescue of rAAV genomes from the Ad/AAV hybrid by VW22 in the present of varied amounts of wtAd or Ad375. Southern blot was performed using a <sup>32</sup>P labelled EGFP-specific probe. The bands corresponding to the linear monomer (M) and dimer (D) of rAAV genomes are indicated. (d) Replication of VW22 was effected by wtAd, but not Ad375. The control group shows VW22 replication in VV-Ad system without the addition of any wtAd or Ad375 viruses. Bars represent the means of three independent experiments.

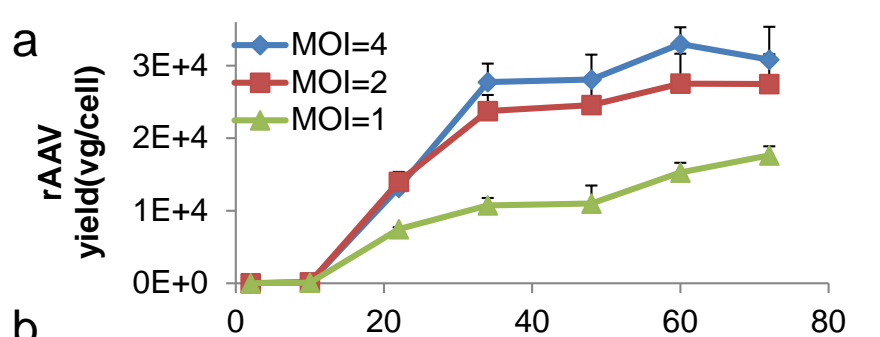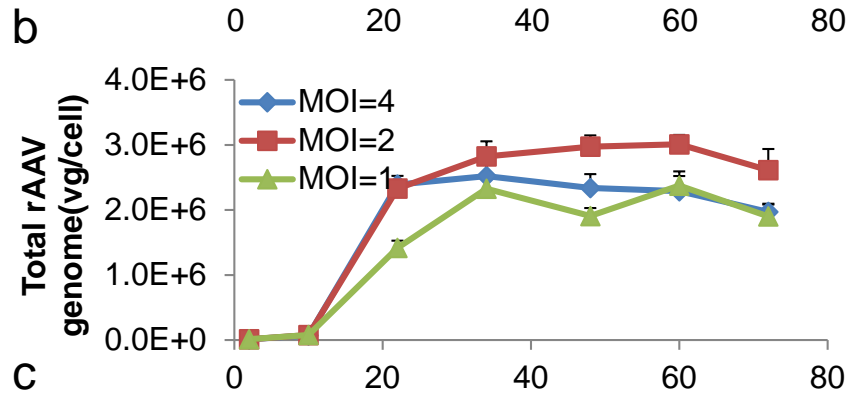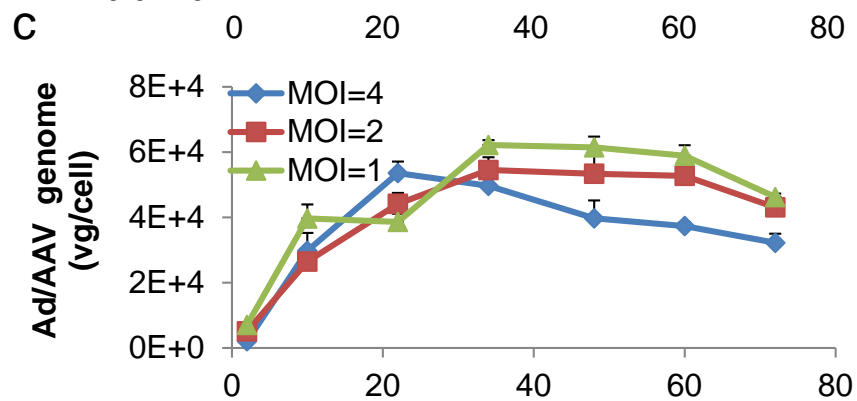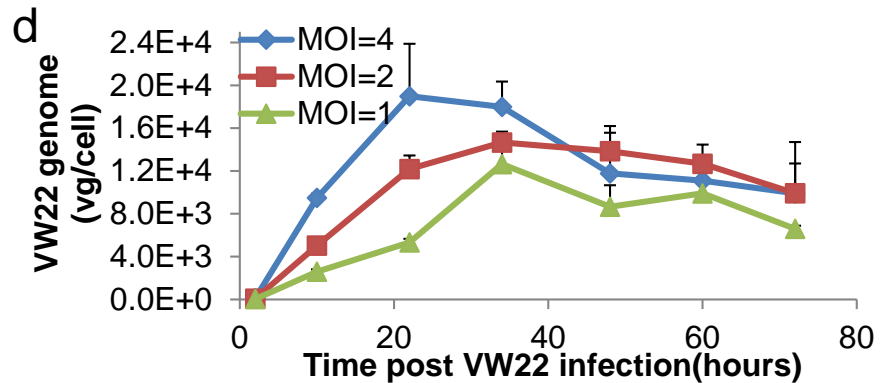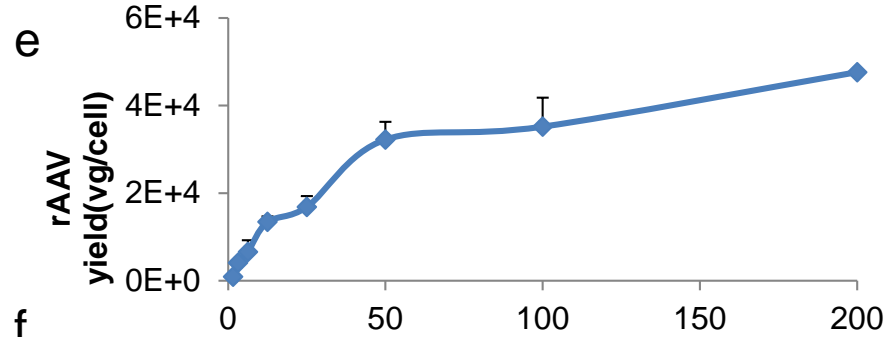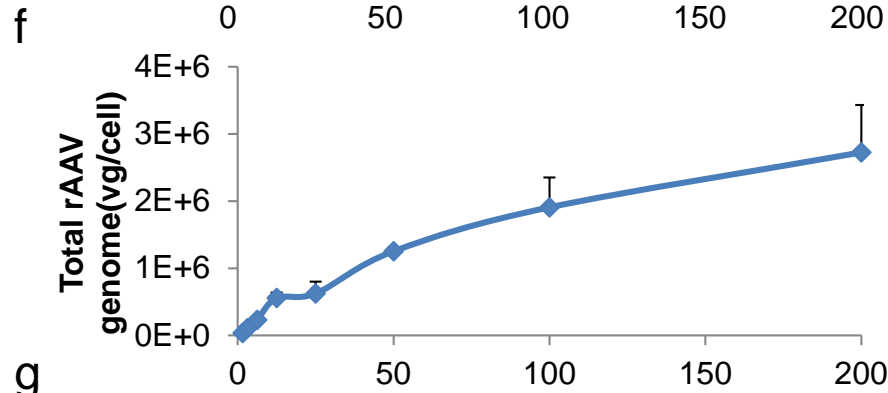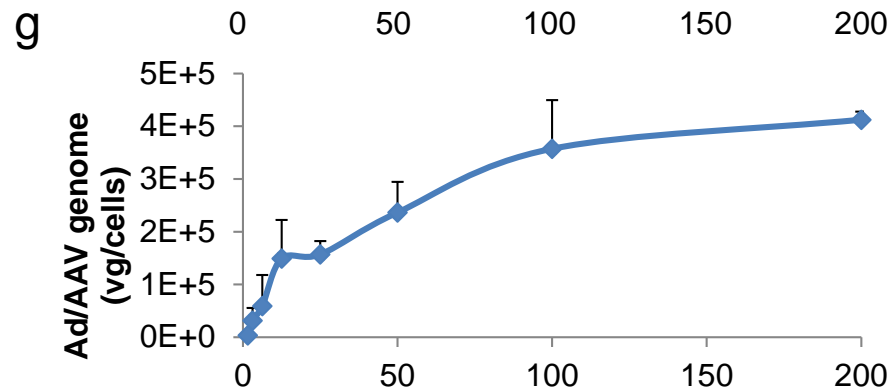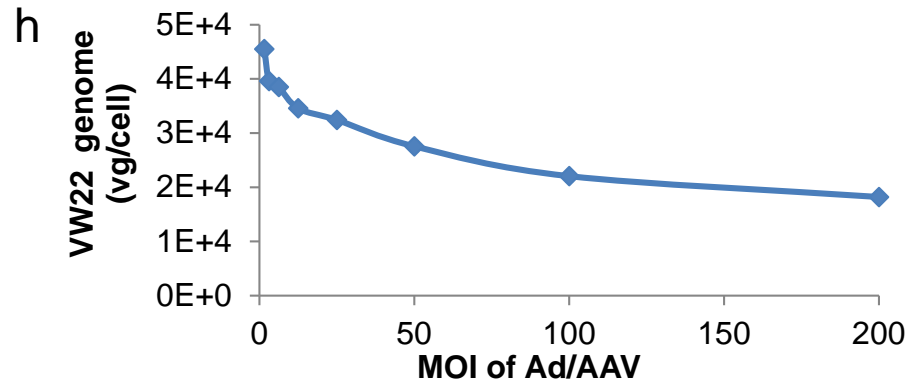

**Supplementary Fig.5 Determination of the optimal multiplicity of infection (MOI) for VW22 and Ad/AAV hybrid vectors in the new VV-Ad system.** The rAAV yield (a,e), total rAAV genomes(b,f), total Ad/AAV genomes(c,g), and total VW22 genomes(d,h) was determined by qPCR as mentioned in “MATERIALS AND METHODS”. (a-d) Effect of VW22 MOI in the VV-Ad system on (a) rAAV yield, (b) rAAV genome accumulation, (c) Ad/AAV replication and (d) VW22 replication. Suspension QW158-7 cells (100 ml, 2e6 cells/ml) were infected with Ad/AAV-CMV-EGFP (MOI=50) and VW22 (MOI=1,2,4) was introduced 16 hs later. 1 ml of cultured sample was harvested at different points post VW22 infection. The X axis present the time points. (e-h) Effect of Ad/AAV MOI in the VV-Ad system on (e) rAAV yield, (f) rAAV genome accumulation, (g) Ad/AAV replication and (h) VW22 replication. Suspension QW158-7 cells (100 ml, 2e6 cells/ml) were infected with Ad/AAV-CMV-EGFP at varied MOIs, and VW22 (MOI=2) was introduced 16 hs later. The X axis present the MOIs of Ad/AAV-CMV-EGFP. Samples were collected 36 hours post VW22 infection. Bars represent the means of three independent experiments.

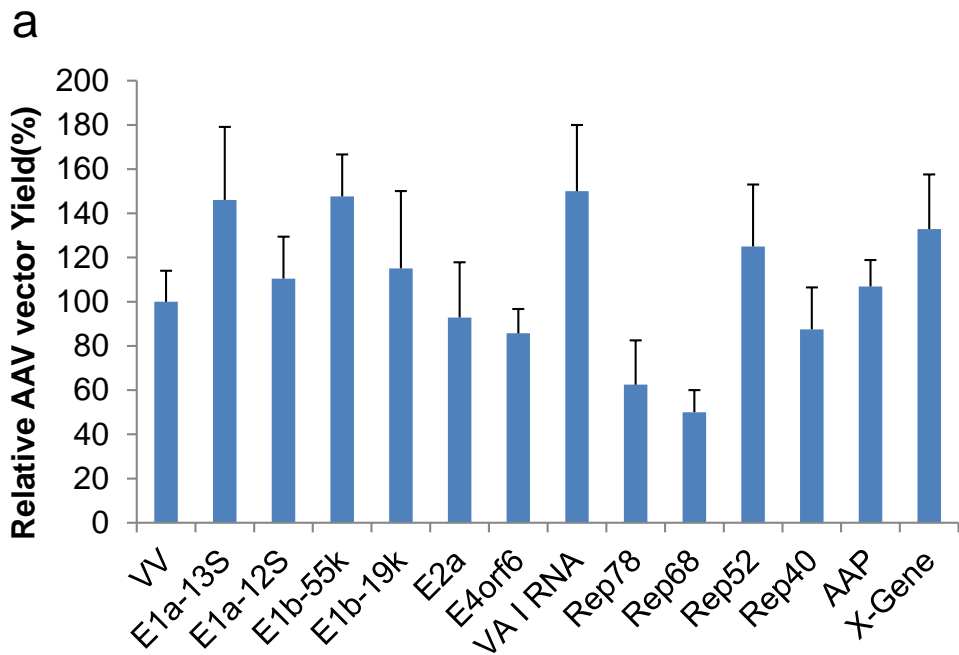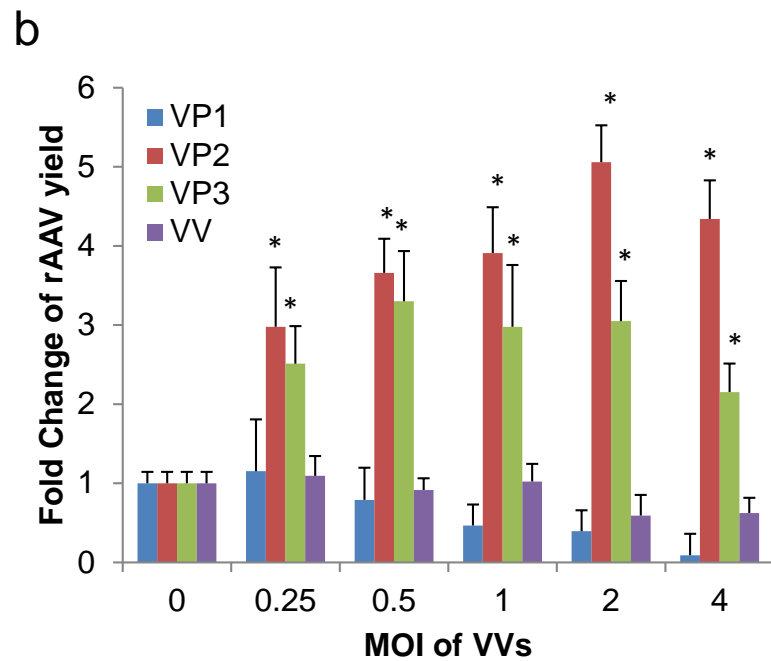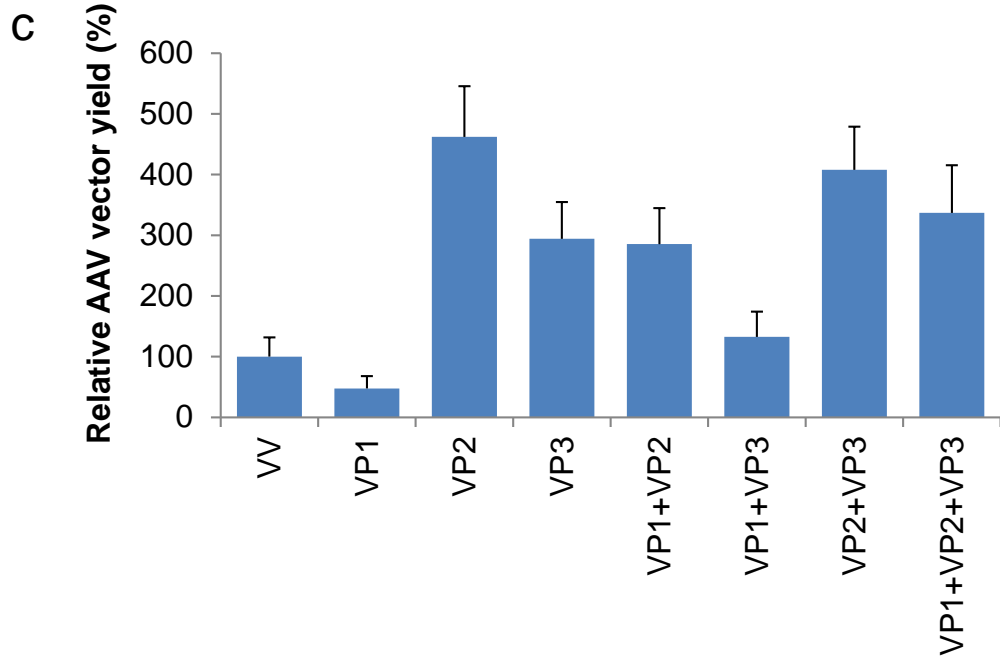

**Supplementary Fig.6 Screening of Ad and AAV genes that may contribute to rAAV vector production in the VV-Ad system.** (a) Genes that failed to significantly increase rAAV production in the VV-Ad system. The Ad related genes included *E1a-13s*, *E1a-12s*, *E1b-55k*, *E1b-19k*, *E2a*, *VA I RNA*, and *E4orf6*. The AAV genes included *Rep78*, *Rep68*, *Rep 52*, *Rep40*, *AAP*, and *X gene*. All the genes were expressed from VV vectors under the control of p7.5 promoter and introduced to the system with MOI=1. The VV control is a vaccinia virus without any exogenous gene expression. (b) Dose-dependent effects of VP1, VP2 and VP3 on rAAV vector production. VVs carrying different genes (MOI=0~4) were co-introduced with VW22 (MOI=1) at 16 hs post Ad/AAV-CMV-EGFP (MOI=50) infection in QW158-7 cells. Y axis presents the fold changes compared with the VV control. (c) The combination effect of VP1, VP2 and VP3. Each VV was infected as MOI=1. In all the experiments, rAAV vectors were harvested at 36 h post VW22 infection and titrated by qPCR. Bars represent the means of three independent experiments.

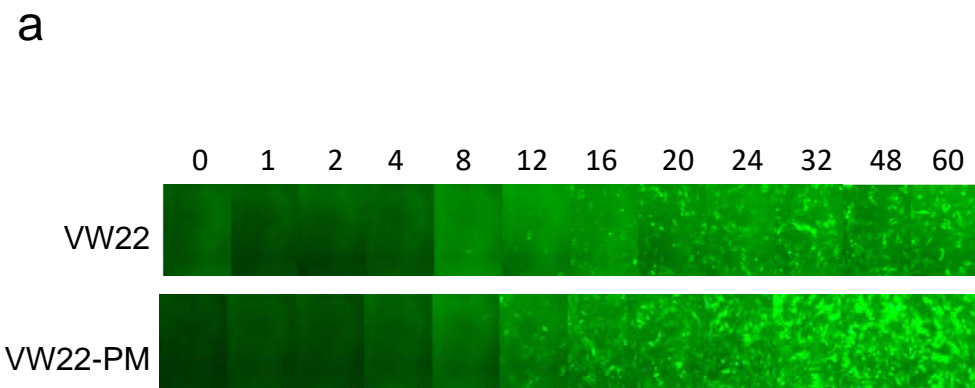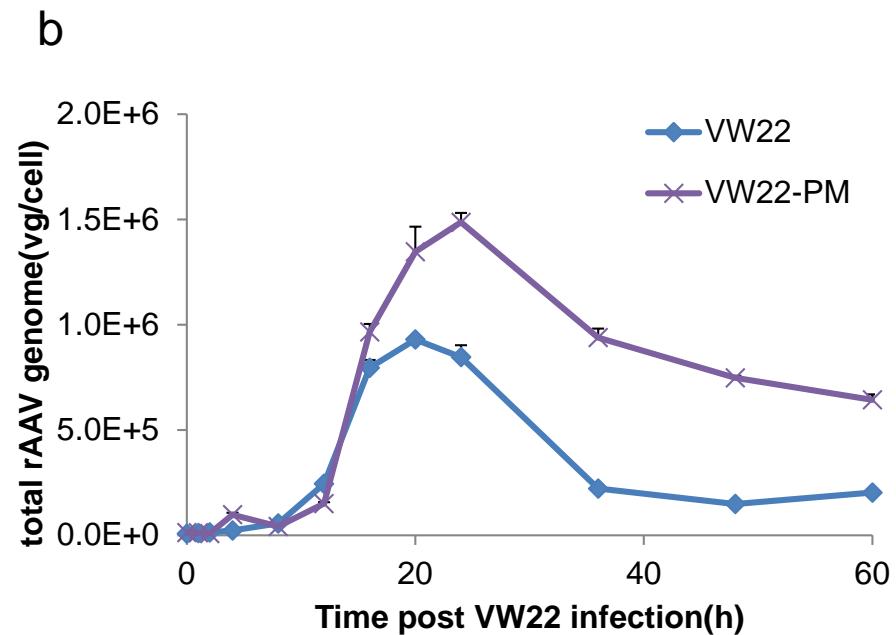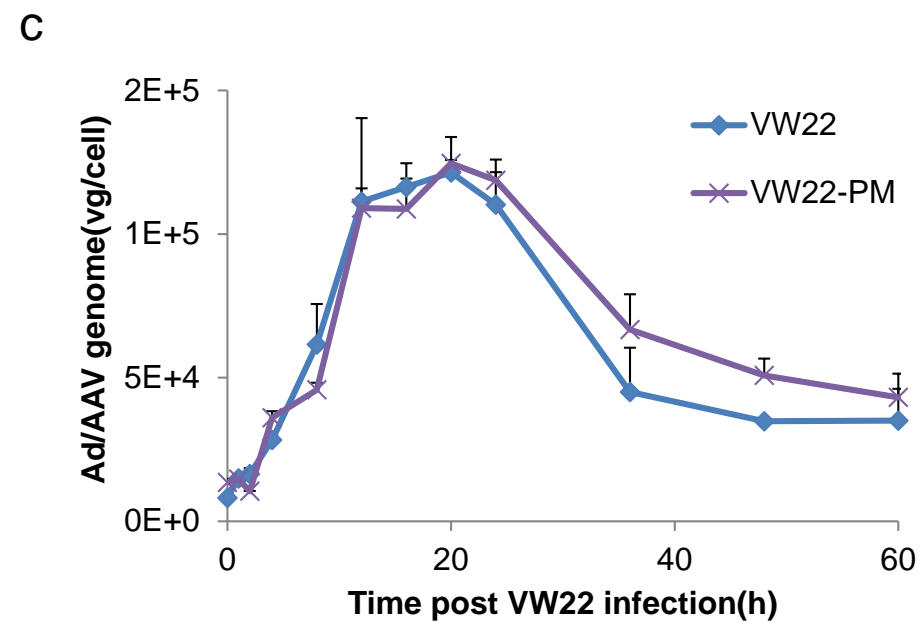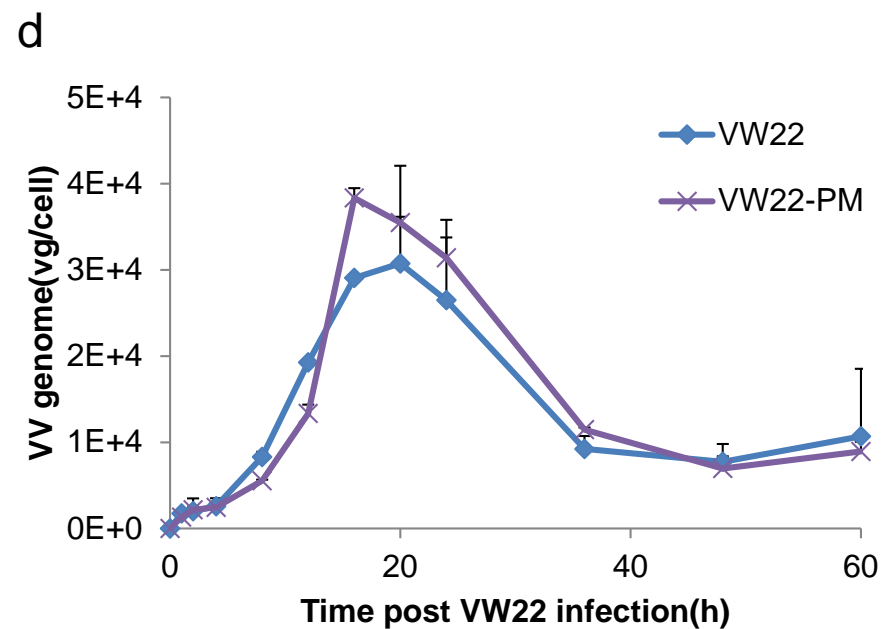

**Supplementary Fig.7 VW22-PM improved rAAV production in the VV-Ad system.** The VW22-PM carrier a Pr4LS5E-mH5 dual promoter to drive VP2/VP3 expression, which led to earlier VP2/VP3 expression and more abundant of VP2/VP3 accumulation (Fig.3). Suspension QW158-7 cells (100 ml, 2e6 cells/ml) were infected with Ad/AAV-CMV-EGFP (MOI=50) and VW22-PM(MOI=2) or VW22 (MOI=2) was introduced 16 hs later. 1 ml of cultured sample was harvested at different points post VV infection. (a) Infectious titers of rAAV vectors produced by the VV-Ad system using either VW22 or VW22-PM. 5  $\mu$ ls of sample was exposed to freeze/thaw, and heat inactivation, then added into each well of a 24-well plate containing GM16095 cells. EGFP was observed 48 h post rAAV transduction. (b-d): Comparison of the effects of VW22-PM and VW22 on VV-Ad system. The titer of total rAAV vectors (b), Ad/AAVgenomes (c) and VV genomes (d) in Ad-VV system were determined by qPCR. Bars represent the means of four independent experiments.

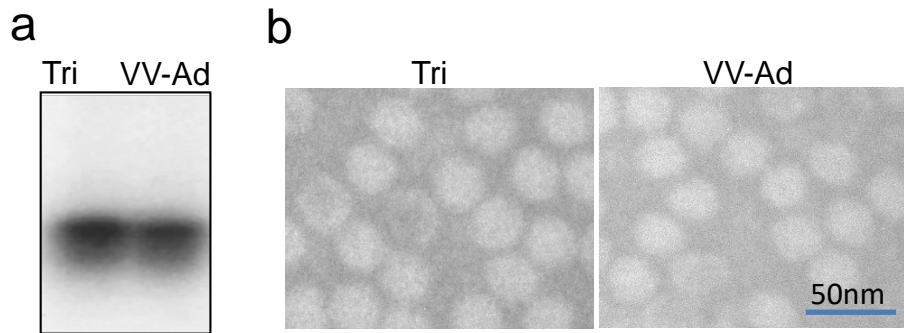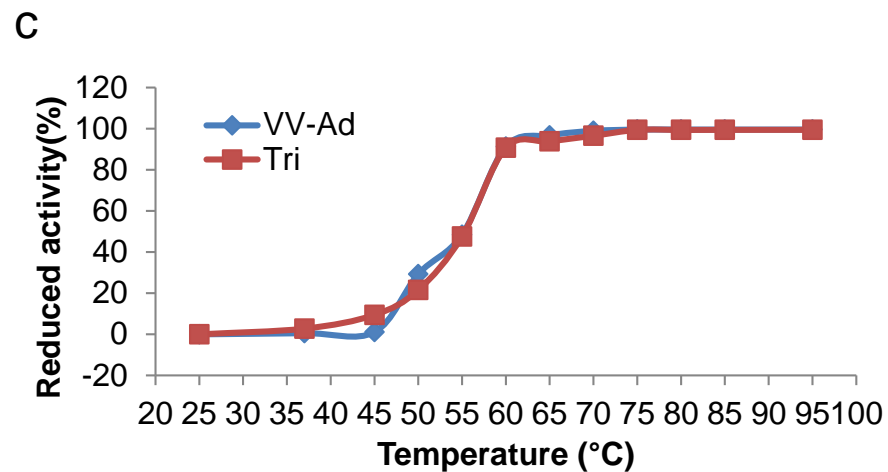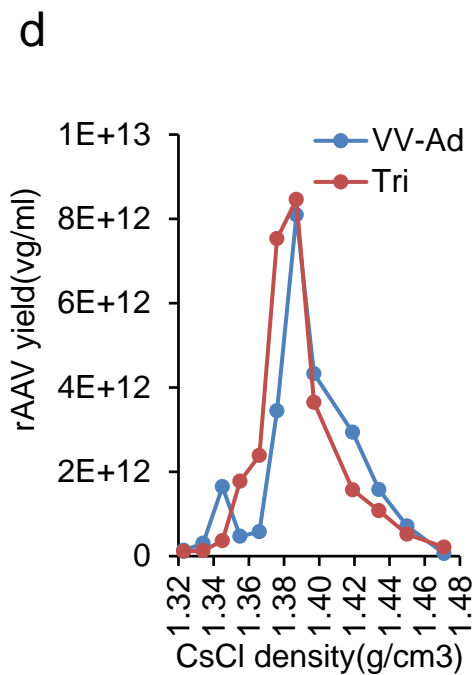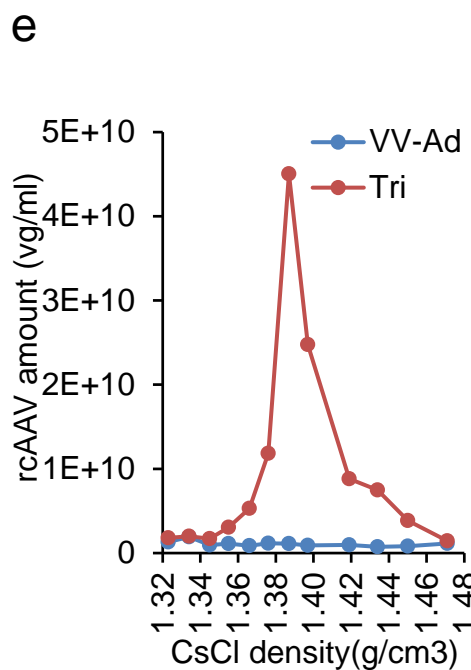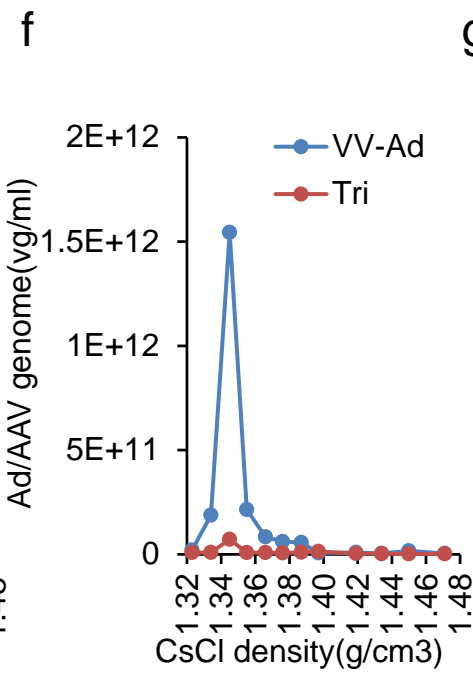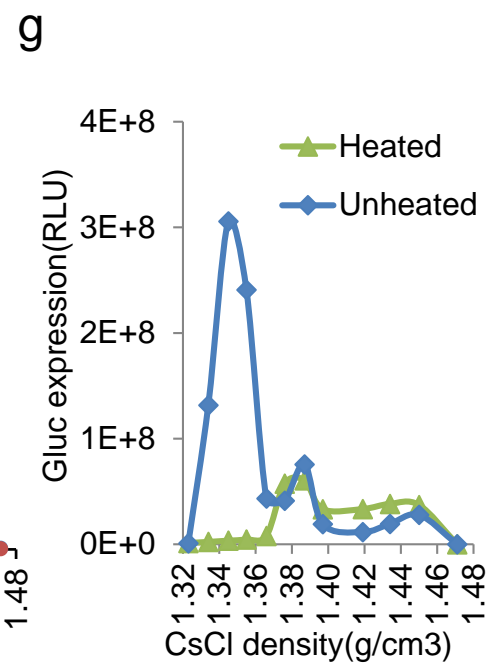



- **Supplementary Fig.8: Comparison of rAAV vectors produced by the VV-Ad system (VV-Ad) and triple plasmid transfection (Tri) methods.** (a) Southern blot analysis of the genome status of purified rAAV vectors. (b) The morphology of rAAV vectors under transmission electron microscopy (TEM). (c) The thermal stability of rAAV vectors. Thermal profile (shown as reduced activity (%) versus temperature (°C) ) of rAAV vectors (after 1 hour treated at different temperature) was determined by Gluc expression in GM16095 cells. (d-g) Characterization of rAAV vectors obtained from different densities of CsCl after two rounds of ultracentrifugation. (d) The distribution of rAAV vectors in CsCl gradient. rAAV genome titer in each sample was determined by qPCR. (e) rcAAV contamination in different CsCl gradient of rAAV vectors. rcAAV genomes were determined by qPCR targeting *Rep78*. (f) Determination of Ad/AAV hybrid contamination in different CsCl gradient of rAAV vectors by qPCR. (g) Inactivation of Ad/AAV hybrid vectors. “Heated” present the Gluc expression from fractions after heating at 56 °C for 1 hour. In this group, the Gluc activity is only expressed from rAAV vectors. The “Unheated” presents the Gluc expression of fractions without any treatment. In this group, Gluc activity could be either from rAAV vectors or from dsAd/AAV-CB-Gluc Ad/AAV hybrid.

Supplementary Table 1. Promoter sequences used in the paper.

|                    |                                                                                                                                                                                                                                                                                                                                                                                       |
|--------------------|---------------------------------------------------------------------------------------------------------------------------------------------------------------------------------------------------------------------------------------------------------------------------------------------------------------------------------------------------------------------------------------|
| LEO160             | TTTTATTTTTTTTTTTGGAATATAAATATCCGGTAAAATTGAAAAATATACACTAATTAGCGTCTC<br>GTTTCAGACGCTAGCTCGAGGTTGGGAGCTCTCCGGATCCAAGCTTATCGATTTTGAACCCGGGG<br>TACCGAATTCCTCGAGGTTGGGAGCTCTCCGGATCCAAGCTTATCGATTTTGAACCCGGGGTACC<br>GAATTCCTCGAG                                                                                                                                                          |
| PR4LS5E            | GTTTTGAATAAAAATTTTTTATAATAAATAAATTTTTAATATATAAATATTCTGCATAAATAAAAAT<br>ATTTTTAGCTTCTAAATATTGATCAATAGTGAAGTTATTGTCAATAAATAGTTTAAACAAAATTGA<br>AATTTTTATTTTTTTTTTTGGAATATAAATAAAAAATTGAAAACTATTCTAATTTATTGCACGGTCC<br>GGTAAAAATTGAAAACTATTCTAATTTATTGCACGGTCCGGTAAAAATTGAAAACTATTCTAAT<br>TTATTGCACGGTCCGGTAAAAATTGAAAACTATTCTAATTTATTGCACGGTCCGGTAAAAATTGAA<br>AACTATTCTAATTTATTGCACGG |
| PHYB               | ACGCGTGTTTAAACGTTTTGAAAATTTTTTATAATAAATATCCGGTAAAATTGAAAACTATTCT<br>AATTTATTGCACGGTCCGGAAAAATTGAAAACTATTCTAATTTATTGCACGGTCCGGTAAAAATT<br>GAAAACTATTCTAATTTATTGCACGGTCCGGTCCGGTAAAAATTGAAAACTATTCTAATTTATT<br>GCACGGTCCGGTCCGGTAAAAATTGAAAACTATTCTAATTTATTGCACGGTCCGGTCCGGA                                                                                                            |
| PRMVA1<br>3.5-LONG | TAAAAATAGAACTATAATCATATAATAGTGTAGGTTGGTAGTATTGCTCTTGTGACTAGAGACTT<br>TAGTTAAGGTACTGTAAAAATAGAACTATAATCATATAATAGTGTAGGTTGGTAGTA                                                                                                                                                                                                                                                        |
| PRS5E              | AAAAATTGAAATTTTATTTTTTTTTTTTGAATATAAATAAAAAATTGAAAACTATTCTAATTTATT<br>GCACGGTCCGGTAAAAATTGAAAACTATTCTAATTTATTGCACGGTCCGGTAAAAATTGAAAA<br>CTATTCTAATTTATTGCACGGTCCGGTAAAAATTGAAAACTATTCTAATTTATTGCACGGTCCGGT<br>AAAAATTGAAAACTATTCTAATTTATTGCACGG                                                                                                                                      |
| MH5                | CTCGAGAAAAATTGAAAATAAATACAAAGGTTCTTGAGGGTTGTGTTAAATTGAAAGCGAGAAAT<br>AATCATAAATAA                                                                                                                                                                                                                                                                                                     |
| ATI                | GTTTTGAATAAAAATTTTTTATAATAAAT                                                                                                                                                                                                                                                                                                                                                         |
| PS                 | AAAATTGAAATTTTATTTTTTTTTTTTGAATATAAATAGCTAGCTCGAG                                                                                                                                                                                                                                                                                                                                     |
| P7.5               | AAAAATTGAAATTTTATTTTTTTTTTTTGAATATAAAT                                                                                                                                                                                                                                                                                                                                                |
